# Supplementary material for: Automatically disambiguating medical acronyms with ontology-aware deep learning
Source: PubMed Central journal article supplement (PMC8423722; doi:10.1038/s41467-021-25578-4), 2021-09-07
Supplement: 41467_2021_25578_MOESM1_ESM.pdf [file 41467_2021_25578_MOESM1_ESM.pdf]

# Supplementary Information

Supplementary Figure 1. **Website we developed containing a sample sentence from i2b2 that we presented to hand labellers.** (a) The abbreviation was highlighted and bolded in the sentence, and words within a context window of 5 were bolded for easier viewing. (b, c) The users were asked to select the expansion from AllAcronyms that best suited the sentence, which was presented in a drop-down menu. If none of the expansions made sense, there was an option to select “None” or “Ambiguous”. We removed these samples from the test set.

**Abbreviation: ivf** ×

What does the abbreviation refer to in this context?

6/4 with 10/10 same pain following bowel of oatmeal with milk at home. a/p : pancreatitis in pt. with pancreatic divisum , recent ab ct and us done. ( 1 ) gi : pt was **made npo and given aggressive ivf hydration to keep hct below 40** as well as iv narcotic for pain control. pt's diet was advanced to liquids 0/12 and solids 3/24 which she tolerated , and was discharged in good condition. pt was asked to follow a

Select an expansion

None of the above

Ambiguous

(a) PREV NEXT

**Abbreviation: ivf** ×

What does the abbreviation refer to in this context?

6/4 with 10/10 same pain following bowel of oatmeal with milk at home. a/p : pancreatitis in pt. with pancreatic divisum , recent ab ct and us done. ( 1 ) gi : pt was **made npo and given aggressive ivf hydration to keep hct below 40** as well as iv narcotic for pain control. pt's diet was advanced to liquids 0/12 and solids 3/24 which she tolerated , and was discharged in good condition. pt was asked to follow a

Select an expansion

- in vitro fertilization
- intervertebral foramina
- intravenous fluids
- intraventricular foramen
- idiopathic ventricular fibrillation
- intravenous feeding

(b) PREV NEXT

**Abbreviation: ivf** ×

What does the abbreviation refer to in this context?

6/4 with 10/10 same pain following bowel of oatmeal with milk at home. a/p : pancreatitis in pt. with pancreatic divisum , recent ab ct and us done. ( 1 ) gi : pt was **made npo and given aggressive ivf hydration to keep hct below 40** as well as iv narcotic for pain control. pt's diet was advanced to liquids 0/12 and solids 3/24 which she tolerated , and was discharged in good condition. pt was asked to follow a

Select an expansion

intravenous fluids

None of the above

Ambiguous

(c) PREV NEXT

Supplementary Table 1. **List of abbreviations from i2b2 we hand-labelled for an auxiliary test set.** We show the abbreviations we considered, the list of possible expansions, the number of sentences containing each expansion. We removed any sentences that had not enough context for disambiguation, spelling mistakes, unrelated concepts, or proper nouns (marked with "OTHER"), as well as expansions that were abbreviations themselves. After applying this filter, 24 abbreviations had more than one expansion. We used these in the final test set.

| Abbreviation to be considered | Expansion: Number sentences labelled with expansion                                       |
|-------------------------------|-------------------------------------------------------------------------------------------|
| afb                           | acid fast bacillus:7/aflatoxin b:1                                                        |
| ain                           | acute tubulo interstitial nephritis:2/anal intraepithelial neoplasia:1/(OTHER:3)          |
| avn                           | atrioventricular node:1/avascular necrosis of bone:3                                      |
| ccu                           | critical care unit:28/coronary care unit:21                                               |
| cva                           | cerebral vascular accidents:43/costovertrbral angle:7                                     |
| cvp                           | central venous pressures:15/cyclophosphamide, vincristine, prednisone:2                   |
| ddi                           | didanosine:2/dual-chamber pacing, dual-chamber sensing, inhibited response:5              |
| derm                          | dermatological:15/dermatologist:7                                                         |
| disp                          | dispense:35/disposition:5                                                                 |
| dtr                           | deep tendon reflexes:4/due to recent:1/daughter:1                                         |
| gms                           | general medical services:20/grams:2                                                       |
| hsm                           | hepatosplenomegaly:29/holosystolic murmur:12                                              |
| ivf                           | in vitro fertilization:2/intravenous feeding:2/intravenous fluids:45/(OTHER:1)            |
| loc                           | loss of consciousness:15  laxative of choice:1                                            |
| mvr                           | mitral valve repair:1/mitral valve replacements:16/(OTHER:13)                             |
| osm                           | osmolarity:3/osmotic:1                                                                    |
| ou                            | oculus uterque:46/observation unit:1/(OTHER:1)                                            |
| pacs                          | picture archiving and communication systems:1/premature atrial contractions:4             |
| phos                          | phosphatase:30/phosphate:20                                                               |
| pvd                           | peripheral vascular diseases:37/pulmonary valve disease:9/posterior vitreous detachment:1 |
| sbp                           | spontaneous bacterial peritonitis:4/systolic blood pressures:46                           |
| sma                           | smooth muscle:18/superior mesenteric arteries:7                                           |
| vac                           | vacuum assisted closure:20/vaccine:2                                                      |
| xl                            | expression levels:1/extended release:49                                                   |

Supplementary Dataset 1. **Full list of 270 abbreviations presented to medical students for hand labelling and location of sentences in i2b2.** We show the abbreviations we considered, the list of possible expansions, and the number of sentences containing each expansion. We marked any expansions that we did not use with round brackets: these were located in sentences that did not have enough context for disambiguation, spelling mistakes, unrelated concepts, or proper nouns (marked with "OTHER"), as well as expansions that were abbreviations themselves. In the third column, we indicate where we found the abbreviations within the i2b2 dataset. The column is formatted as follows:

```
{expansion_1}::{note_1_name}:{starting_index_of_abbreviation}{note_2_name}:{starting_index_of_abbreviation}
///{expansion_2}::{note_1_name}:{starting_index_of_abbreviation. Note that we removed the filetype from the
note name (i.e. ".txt", ".xml"), and we replaced all whitespace characters with a single space (i.e. `note =
re.sub(r"\s\s+", " ", note).lower()`, where `re` is the Python regular expression library).
```

This dataset is located in a separate spreadsheet.
